# Supplementary material for: Phylogenetic Studies and Metabolite Analysis of Sticta Species from Colombia and Chile by Ultra-High Performance Liquid Chromatography-High Resolution-Q-Orbitrap-Mass Spectrometry
Source: MDPI journal article supplement (doi:10.3390/metabo12020156), 2022-02-08
Supplement: s1 [file s1]

## *Supplementary Material*

# **Phylogenetic studies and Metabolite Analysis of *Sticta* Species from Colombia and Chile by Ultra-High Performance Liquid Chromatography-High Resolution-Q-Orbitrap-Mass Spectrometry**

**Laura Albornoz<sup>1‡</sup>, Alfredo Torres-Benítez<sup>2‡</sup>, Miguel Moreno-Palacios<sup>3</sup>, Mario J. Simirgiotis<sup>2</sup>, Saúl A. Montoya S.<sup>4</sup>, Beatriz Sepulveda<sup>5</sup>, Elena Stashenko<sup>6</sup>, Olimpo García-Beltrán<sup>7,8\*</sup> and Carlos Areche<sup>1\*</sup>**

<sup>1</sup> Departamento de Química, Facultad de Ciencias, Universidad de Chile, Las Palmeras 3425, Nuñoa, Santiago 7800024. E mail: albornoznocachomail.c@hotmail.com (L.A), areche@uchile.cl (C.A).

<sup>2</sup> Instituto de Farmacia, Facultad de Ciencias, Universidad Austral de Chile, Campus Isla Teja 5090000, Valdivia, Chile. E mail: alfredo.torres@unibague.edu.co (A.T.B), mario.simirgiotis@uach.cl (M.J.S)

<sup>3</sup> Laboratorio de Biología Evolutiva de Vertebrados, Departamento de Ciencias Biológicas, Universidad de Los Andes, Bogotá, Colombia. E mail: mc.morenop@uniandes.edu.co (M.M.-P.)

<sup>4</sup> Laboratorio de toxicología, seccional Tolima, Instituto Nacional de Medicina Legal y Ciencias Forenses. Ibagué, Colombia. E mail: samontoya@medicinalegal.gov.co (S.A.M.S)

<sup>5</sup> Departamento de Ciencias Químicas, Universidad Andres Bello, Campus Viña del Mar, Quillota 980, Viña del Mar, Chile. Email: bsepulveda@uc.cl (B.S.)

<sup>6</sup> Research Center of Excellence CENIVAM, CIBIMOL, Universidad Industrial de Santander, Building 45, UIS, Carrera 27, Calle 9, Bucaramanga 680002, Colombia; elena@tucan.uis.edu.co

<sup>7</sup> Universidad Bernardo O'Higgins, Centro Integrativo de Biología y Química Aplicada (CIBQA), General Gana 1702, Santiago, Chile, 8370854.

<sup>8</sup> Facultad de Ciencias Naturales y Matemáticas, Universidad de Ibagué, Carrera 22 Calle 67, Ibagué 730002, Colombia

<sup>‡</sup> These two authors share first authorship

\* Correspondence: jose.garcia@unibague.edu.co (O.G.-B.); areche@uchile.cl (C.A). Tel.: +57-8276-0010 (O.G.-B.); +56 988377059 (C.A).

Supplementary table S1. Description of character and character states used in the present study of *Sticta*

|                    |                           |   |
|--------------------|---------------------------|---|
| <b>Character 1</b> | <b>Primary photobiont</b> |   |
| Character status   | Green alga                | 1 |
|                    | Cyanobacteria             | 2 |

|                    |                      |   |
|--------------------|----------------------|---|
| <b>Character 2</b> | <b>Peduncle</b>      |   |
| Character status   | Absent               | 0 |
|                    | Indistinct           | 1 |
|                    | Absent to indistinct | 2 |

|                    |                                                                                               |   |
|--------------------|-----------------------------------------------------------------------------------------------|---|
| <b>Character 3</b> | <b>Thallus</b>                                                                                |   |
| Character status   | Irregular, moderately branched, 3-5 branched, anisotomous to pleurotomous type.               | 1 |
|                    | Irregular, moderately branched, 3-5 branching, anisotomic to polytomic type                   | 2 |
|                    | Irregular, highly branched, 6-10 branching, polytomous to pleurotomous type                   | 3 |
|                    | Irregular, much branched, 6-10 branched, pleurotomical to dichotomous type                    | 4 |
|                    | Irregular to suborbicular, moderately branched, 3-5 branching, anisotomic to pleurotomic type | 5 |
|                    | Irregular to suborbicular, highly branched, 6-10 branched, anisotomous to pleurotomous type   | 6 |
|                    | Orbicular, sparsely branched, 0-2 branched, polytomous type                                   | 7 |
|                    | Orbicular to suborbicular, sparsely branched, 0-2 branched, polytomous to anisotomous type    | 8 |
|                    | Palmate, moderately branched, 3-5 branched, anisotomic to polytomic type                      | 9 |

|                    |                                                                                                                                                                                         |   |
|--------------------|-----------------------------------------------------------------------------------------------------------------------------------------------------------------------------------------|---|
| <b>Character 4</b> | <b>Lobes</b>                                                                                                                                                                            |   |
| Character status   | Lacinate to ligulate, ascending to subpendulous, interspaced to adjacent, revolute, apices rounded to obtuse, margins entire, internodes of lobes papillose-fragile                     | 1 |
|                    | Lacinate to ligulate, adnate, imbricate, flat to involute, apices rounded, margins entire to sinuous, internodes of subcoriaceous-fragile lobes                                         | 2 |
|                    | Lacinate to ligulate, horizontal to subpendulous, imbricate, wavy, rounded apices, margins entire, internodes of coriaceous-resistant lobes                                             | 3 |
|                    | Ligulate to flabellate, horizontal to slightly ascending, imbricate, wavy to involucrate, apices rounded to truncate, margins entire to sinuous, internode of leathery-fragile lobes    | 4 |
|                    | Ligulate to flabellate, adnate to slightly ascending, imbricate, involucrate to slightly caniculate, apices rounded, margins entire to crenulate, internode of leathery lobes-resistant | 5 |
|                    | Ligulate to flabellate, adnate, adjacent to imbricate, flat to wavy, apices rounded, margins entire to crenulate, internode of leathery-fragile lobes                                   | 6 |
|                    | Ligulate, subpendulous, adjacent to imbricate, flat, apices obtuse to acute, margins entire, internode of coriaceous-fragile lobes                                                      | 7 |

|  |                                                                                                                                                                |    |
|--|----------------------------------------------------------------------------------------------------------------------------------------------------------------|----|
|  | Flabellate to ligulate, adnate to horizontal, adjacent to imbricate, wavy, rounded apices, entire to sinuous margins, internodes of leathery-resistant lobes   | 8  |
|  | Flabellate, ascending to subpendulous, imbricate, involucrate to caniculate, apices rounded, margins entire to crenulate, internodes of lobes papyrose-fragile | 9  |
|  | Suborbicular, horizontal to slightly ascending, imbricate, involuting to undulate, apices rounded, margins entire, internodes of lobes coriaceous-fragile      | 10 |
|  | Suborbicular, horizontal to subpendicular, imbricate, wavy, rounded apices, margins entire, internode of lobes subcoriaceous to coriaceous-fragile             | 11 |

| Character 5      | Superior surface                                                                                                                                                                                |    |
|------------------|-------------------------------------------------------------------------------------------------------------------------------------------------------------------------------------------------|----|
| Character status | Smooth to laxly scrobiculate, yellow-green, glabrous surface, with or without sparse papillae, without pruina, without macules or with cream irregular macules                                  | 1  |
|                  | Smooth to slightly scrobiculated, brownish green, surface pubescent to scabrous, without papillae, without pruina, with white irregular macules                                                 | 2  |
|                  | Smooth - scrobiculated to slightly rugose towards the center, greenish-gray, glabrous surface, without papillae, without pruina, with irregular white macules                                   | 3  |
|                  | Smooth to ribbed, greenish brown, scabrous surface, without papillae, without pruina, with cream irregular macules                                                                              | 4  |
|                  | Smooth to centrally rough, bluish-green, glabrous surface, no papillae, no pruina, with cream irregular macules                                                                                 | 5  |
|                  | Rough to slightly scrobiculated, greenish brown, glabrous surface, without papillae to sparse, without pruina, with cream irregular macules                                                     | 6  |
|                  | Rough to smooth, brownish gray, surface glabrous, no papillae, no pruina, with cream irregular macules                                                                                          | 7  |
|                  | Foveolate to centrally rugose, dark green to brownish green, glabrous surface, with or without sparse papillae and in some cases papillotrichomes, without pruina, with cream irregular macules | 8  |
|                  | Scrobiculate to faveolate, yellow-green, glabrous surface, without papillae, without pruina, with irregular white maculae                                                                       | 9  |
|                  | Scrobiculate to slightly rough, yellow-green, glabrous surface, without papillae, without pruina, with irregular cream macules                                                                  | 10 |
|                  | Scrobiculate to rough or wavy, spermy green, arachnoid to spongy surface, without papillae, without pruina, with cream irregular macules                                                        | 11 |

| Character 6      | Cilia              |   |
|------------------|--------------------|---|
| Character status | Absent             | 0 |
|                  | Scarce             | 1 |
|                  | Abundant to absent | 2 |
|                  | Abundant to scarce | 3 |
|                  | Abundant           | 4 |

| Character 7 | Apothecia |  |
|-------------|-----------|--|
|-------------|-----------|--|

# Supplementary Material

|                  |                                                                                                                                                                                                    |   |
|------------------|----------------------------------------------------------------------------------------------------------------------------------------------------------------------------------------------------|---|
| Character status | Sparse                                                                                                                                                                                             | 1 |
|                  | Scanty to abundant, submarginal, sparse, subpedicellate, slight lower basal invagination, disc reddish-brown-brilliant brown, margin entire to slightly tomentose pale yellowish-brown pubescent   | 2 |
|                  | Abundant, laminar, sparse, pedicellate, pronounced basal invagination, disc orange to reddish-reddish-bright reddish-brown, margin cream to beige hirsute                                          | 3 |
|                  | Abundant, laminar, sparse, pedicellate, pronounced lower basal invagination, orange to reddish-orange-opaque disc, white to cream tomentose to hirsute margin                                      | 4 |
|                  | Abundant, laminar, sparse, subpedicellate, pronounced lower basal invagination, disc reddish-brown to dark brown-bright, margin hirsute-tomentose yellowish brown                                  | 5 |
|                  | Abundant, laminar, aggregate, pedicellate, pronounced lower basal invagination, disc reddish-brown to dull brown, margin hirsute to entire brown and creamy white                                  | 6 |
|                  | Abundant, laminar, sessile to subpedicellate, slight lower basal invagination, disc orange to reddish-brown-opaque to shiny, margin entire crenulate to creamy white tomentose                     | 7 |
|                  | Abundant, submarginal, clustered to sparse, subpedicellate, pronounced lower basal invagination, orange to orange brown-opaque disc, crenulate to slightly hirsute pale ochre to dark brown margin | 8 |
|                  | Abundant, submarginal, aggregate, subpedicellate, pronounced lower invagination, disc orange-brown to reddish-brown-opaque, upper margin crenulate and lower margin hirsute creamy white to beige  | 9 |

|                    |                                                  |   |
|--------------------|--------------------------------------------------|---|
| <b>Character 8</b> | <b>Vegetative propagules</b>                     |   |
| Character status   | Absent                                           | 0 |
|                    | Marginal, aggregates, pale blue-grayish color    | 1 |
|                    | Laminates, aggregates, dark brownish-green color | 2 |
|                    | Marginals, dark brown aggregates                 | 3 |

|                    |                |   |
|--------------------|----------------|---|
| <b>Character 9</b> | <b>Medulla</b> |   |
| Character status   | Lax            | 1 |
|                    | Compact        | 2 |
|                    | Lax to compact | 3 |

|                     |                                       |   |
|---------------------|---------------------------------------|---|
| <b>Character 10</b> | <b>Lower surface</b>                  |   |
| Character status    | Smooth to veined cream yellow         | 1 |
|                     | Smooth to wavy cream to light brown   | 2 |
|                     | Smooth to wavy cream to dark brown    | 3 |
|                     | Smooth to wavy white to grayish-brown | 4 |
|                     | Wavy cream-colored                    | 5 |
|                     | Wavy black                            | 6 |

|  |                                    |    |
|--|------------------------------------|----|
|  | Cream-white to beige-brown wavy    | 7  |
|  | Wavy cream-white to cream-white    | 8  |
|  | Wavy to light-brown ribbed         | 9  |
|  | Wavy to ribbed beige to dark brown | 10 |

| Character 11     | Primary tomentum                                                         |   |
|------------------|--------------------------------------------------------------------------|---|
| Character status | Sparse, thin, pubescent to fasciculate, rough, cream colored             | 1 |
|                  | Sparse, thin, spongy to arachnoid, coarse, dark brown                    | 2 |
|                  | Sparse, thin, spongy, soft, golden-brown to dark brown                   | 3 |
|                  | Irregular, coarse, spongy to fasciculate, soft, grayish brown            | 4 |
|                  | Irregular, coarse, spongy to fasciculate, soft, white to grayish white   | 5 |
|                  | Dense, coarse, spongy, rough, gray-brown to dark gray-brown              | 6 |
|                  | Dense, coarse, spongy, soft, blackish brown                              | 7 |
|                  | Dense, coarse, spongy, soft, cream colored                               | 8 |
|                  | Dense, coarse, spongy to fasciculate, soft, cream-white to grayish brown | 9 |

| Character 12     | Secondary tomentum |   |
|------------------|--------------------|---|
| Character status | Absent             | 0 |
|                  | Arachnoid, clear   | 1 |
|                  | Pubescent, clear   | 2 |

| Character 13     | Rhizines                             |   |
|------------------|--------------------------------------|---|
| Character status | Absent                               | 0 |
|                  | Few white to cream colored marginals | 1 |
|                  | Scanty marginal black-brown          | 2 |
|                  | Sparse scattered white to cream      | 3 |
|                  | Abundant central black to brown      | 4 |
|                  | Abundant scattered white             | 5 |

| Character 14     | Cyphellae                                                                                                                             |   |
|------------------|---------------------------------------------------------------------------------------------------------------------------------------|---|
| Character status | Sparse, scattered, rounded to angular, immersed to prominent, margin without tomentum, basement membrane pubescent to yellow pruinose | 1 |
|                  | Abundant, scattered, rounded to angular, immersed to prominent, margin with tomentum, white pubescent basement membrane               | 2 |
|                  | Abundant, scattered, rounded to angular, erumpent to suprasessile, margin without tomentum, white pubescent basement membrane         | 3 |
|                  | Abundant, scattered, rounded to angular, erumpent to sessile, margin without tomentum, cream pubescent basement membrane              | 4 |
|                  | Abundant, scattered, rounded, immersed to erumpent, margin without tomentum, white pubescent basement membrane                        | 5 |
|                  | Abundant, scattered, rounded, immersed to erumpent, margin with tomentum, white pubescent basement membrane                           | 6 |

## Supplementary Material

|  |                                                                                                                                           |    |
|--|-------------------------------------------------------------------------------------------------------------------------------------------|----|
|  | Abundant, scattered, rounded, immersed to prominent, margin without tomentum, white to cream or yellowish pubescent basement membrane     | 7  |
|  | Abundant, scattered, rounded, prominent to sessile, margin without tomentum, basement membrane pubescent white                            | 8  |
|  | Abundant, scattered, rounded to irregular, immersed to prominent, margin without tomentum, basement membrane pubescent cream colored      | 9  |
|  | Abundant, scattered, rounded to irregular, immersed to erumpent, margin with tomentum, white to cream colored pubescent basement membrane | 10 |
|  | Abundant, scattered, angular to rounded, prominent to suprasessile, margin without tomentum, basement membrane pubescent white            | 11 |

|                     |                   |   |
|---------------------|-------------------|---|
| <b>Character 15</b> | <b>Cephalodia</b> |   |
| Character status    | Present           | 1 |
|                     | Absent            | 0 |

|                     |                 |   |
|---------------------|-----------------|---|
| <b>Character 16</b> | <b>Pycnidia</b> |   |
| Character status    | Present         | 1 |
|                     | Absent          | 0 |

Supplementary table S2. Character state matrix of morphological traits used to recover phylogenetic relationships in species of *Sticta*

| ESPECIE/CARACTER              | 1 | 2 | 3 | 4 | 5 | 6 | 7 | 8 | 9 | 10 | 11 | 12 | 13 | 14 | 15 | 16 |
|-------------------------------|---|---|---|---|---|---|---|---|---|----|----|----|----|----|----|----|
| <i>Sticta lineariloba</i>     | 1 | 1 | 1 | 1 | 1 | 0 | 2 | 0 | 1 | 1  | 1  | 0  | 1  | 1  | 1  | 1  |
| <i>Sticta impressula</i>      | 2 | 0 | 3 | 4 | 8 | 4 | 3 | 0 | 2 | 7  | 6  | 0  | 0  | 3  | 0  | 1  |
| <i>Sticta ocaniensis</i>      | 1 | 0 | 4 | 7 | 9 | 1 | 6 | 0 | 2 | 9  | 2  | 0  | 2  | 5  | 1  | 1  |
| <i>Sticta cf. andina</i>      | 2 | 0 | 5 | 8 | 6 | 2 | 8 | 0 | 2 | 6  | 7  | 1  | 4  | 8  | 0  | 1  |
| <i>Sticta cf. hypoglabra</i>  | 2 | 0 | 5 | 2 | 7 | 0 | 1 | 1 | 2 | 2  | 4  | 1  | 0  | 9  | 0  | 1  |
| <i>Sticta cordillerana</i>    | 1 | 0 | 1 | 3 | A | 3 | 5 | 0 | 2 | A  | 3  | 0  | 3  | 4  | 1  | 1  |
| <i>Sticta cf. gyalocarpa</i>  | 2 | 0 | 7 | A | 2 | 4 | 9 | 0 | 3 | 4  | 5  | 1  | 0  | 2  | 0  | 0  |
| <i>Sticta leucoblepharis</i>  | 2 | 2 | 9 | 9 | 3 | 4 | 7 | 0 | 1 | 8  | 9  | 2  | 0  | B  | 0  | 0  |
| <i>Sticta parahumboldtii</i>  | 2 | 0 | 8 | B | B | 4 | 4 | 0 | 2 | 5  | 8  | 1  | 0  | A  | 0  | 1  |
| <i>Sticta pseudosylvatica</i> | 2 | 0 | 2 | 5 | 4 | 0 | 1 | 2 | 2 | 3  | 9  | 2  | 0  | 6  | 0  | 1  |
| <i>Sticta luteocyphellata</i> | 2 | 0 | 6 | 6 | 5 | 0 | 1 | 3 | 2 | 3  | 9  | 1  | 5  | 7  | 0  | 1  |
